# Supplementary material for: Understanding the dynamics of Toll-like Receptor 5 response to flagellin and its regulation by estradiol
Source: PubMed Central journal article supplement (PMC5256028; doi:10.1038/srep40981), 2017-01-23

# **Understanding the dynamics of Toll-like Receptor 5 response to flagellin and its regulation by estradiol**

Ignacio Caballero<sup>2,3</sup>, James Boyd<sup>4</sup>, Carmen Almiñana<sup>2</sup>, Javier A. Sánchez-López<sup>2</sup>, Shaghayegh Basatvat<sup>2</sup>, Mehrnaz Montazeri<sup>2</sup>, Nasim Maslehat Lay<sup>2</sup>, Sarah Elliott<sup>2</sup>, David G. Spiller<sup>4</sup>, Michael R. White<sup>4</sup>, Alireza Fazeli<sup>1,2,\*</sup>

<sup>1</sup>Institute of Biomedicine and Translational Medicine, Department of Pathophysiology, University of Tartu, Tartu, Estonia

<sup>2</sup>Academic Unit of Reproductive and Developmental Medicine, Department of Oncology and Metabolism, The Medical School, University of Sheffield, Sheffield, United Kingdom.

<sup>3</sup>ISP, INRA, Université Tours, 37380, Nouzilly, France.

<sup>4</sup>Michael Smith Building, Faculty of Life Sciences, University of Manchester, Manchester, United Kingdom.

\*[Fazeli@ut.ee](mailto:Fazeli@ut.ee)

## Supplementary data

**Table S1. Primers used for evaluation of gene expression by quantitative real-time PCR amplification.**

| Gene                  | Forward primer            | Reverse primer         | Annealing T (°C) | Product size (bp) |
|-----------------------|---------------------------|------------------------|------------------|-------------------|
| TLR5                  | CACCAAACCAGGGATGCTAT      | CCTGTGTATTGATGGGCAAA   | 58               | 111               |
| I $\kappa$ B $\alpha$ | CCCTACACCTTGCCTGTGAG      | CGTGTGGCCATTGTAGTTGG   | 62               | 116               |
| IL-1ra                | CCAGCAAGATGCAAGCCTTCAGAAT | CCAGACTTGACACAGGACAGGC | 60               | 129               |
| ESR1                  | GAATCTGCCAAGGAGACTCG      | ATCTCTCGGCGCTTGTGTT    | 60               | 288               |
| B-actin               | CAAGATCATTGCTCCTCCTG      | ATCCACATCTGCTGGAAGG    | 62               | 152               |
| B2M                   | TATGCCTGCCGTGTGAACCA      | GCGGCATCTCAAACCTCCA    | 62               | 98                |

**Figure S1. Schematic depiction of the three different reporter constructs used:** i) a reporter vector that contains 5x  $\kappa$ B binding sites and the ELAM minimum promoter driving the expression of secreted alkaline phosphatase (SEAP), used to measure NF- $\kappa$ B transcription activity (pNifty2-SEAP); ii) a reporter vector that contains 5x TPA responsive elements (TRE) and a the IFN- $\beta$  minimum promoter driving the expression of secreted alkaline phosphatase (SEAP). AP-1 binds to TRE and transcription activity is related to SEAP secretion (pNifty-3-A-SEAP); iii) a vector expressing RelA fused to the Discosoma sp. red fluorescent protein dsRed-Express (RelA-dsRedxp), used to evaluate RelA translocation pulses into the nucleus; and iv) a reporter vector containing a 3.5 kb promoter region from the TLR5 locus driving SEAP expression, used to evaluate TLR5 gene expression.

**Figure S2. Analysis of RelA-dsRedxp dynamics in MCF7 cells responding or not to flagellin stimulation.** MCF7 cells were transiently transfected with RelA-dsRedxp and pre-incubated or not (control) with 10 nM E2 for 24 h before stimulation with 100 ng/ml of flagellin. (A and B) Time course of nuclear:total fluorescence intensities of RelA-dsRedxp in control MCF7 cells responding (A) or not (B) to flagellin stimulation. (C and D) Time course of nuclear:total fluorescence intensities of RelA-dsRedxp in MCF7 cells pre-incubated with 10 nm E2 responding (C) or not (D) to flagellin stimulation.

**Figure S3. Estradiol modulates ESR1 gene expression.** Real-time qPCR analysis of ESR1 gene expression in MCF7 cells cultured in the presence of 10 nM E2 or not (control) and stimulated with 100 ng/ml of flagellin for 1, 2, 4 and 8 h before collection. Data are

representative of at least five three independent experiments. Error bars denote SEM. The asterix (\*) indicates a significant difference ( $p < 0.05$ ).

**Figure S4. Estrogen receptors modulate TNF- $\alpha$  activation of NF- $\kappa$ B transcription activity.** MCF7 cells transiently transfected with pNifty2-SEAP were pre-incubated with ER agonists PPT, DPN or G1 (1000 nM) for 24 h and then stimulated with 100 ng/ml of flagellin and supernatant collected at 6 and 24 h. Samples were analyzed using NovaBright™ Secreted Placental Alkaline Phosphatase (SEAP) Enzyme Reporter Gene Chemiluminescent Detection System 2.0. Control Data of NF- $\kappa$ B activity are reported as the fold induction of SEAP activity over untreated controls. Different letters (a and b) indicate significant differences ( $p < 0.05$ ).

**Figure S1**

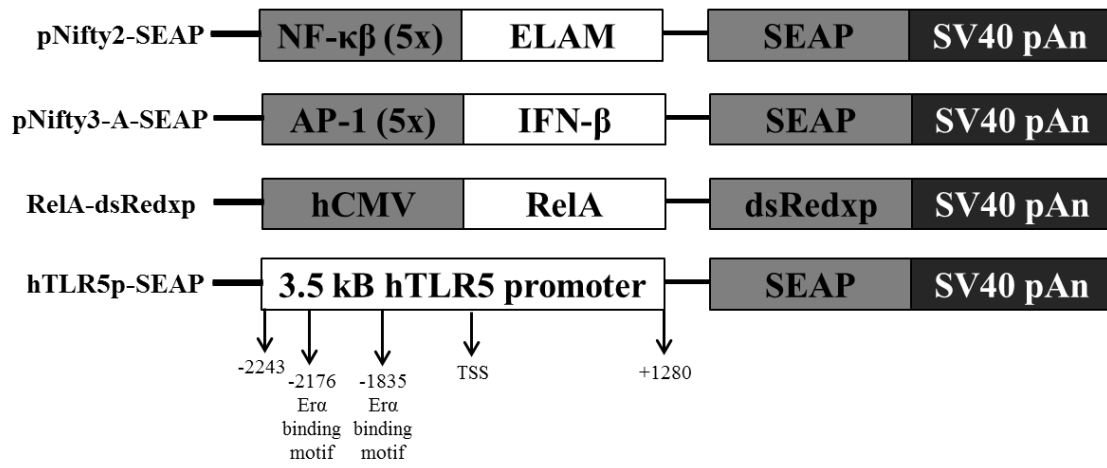

**Figure S2**

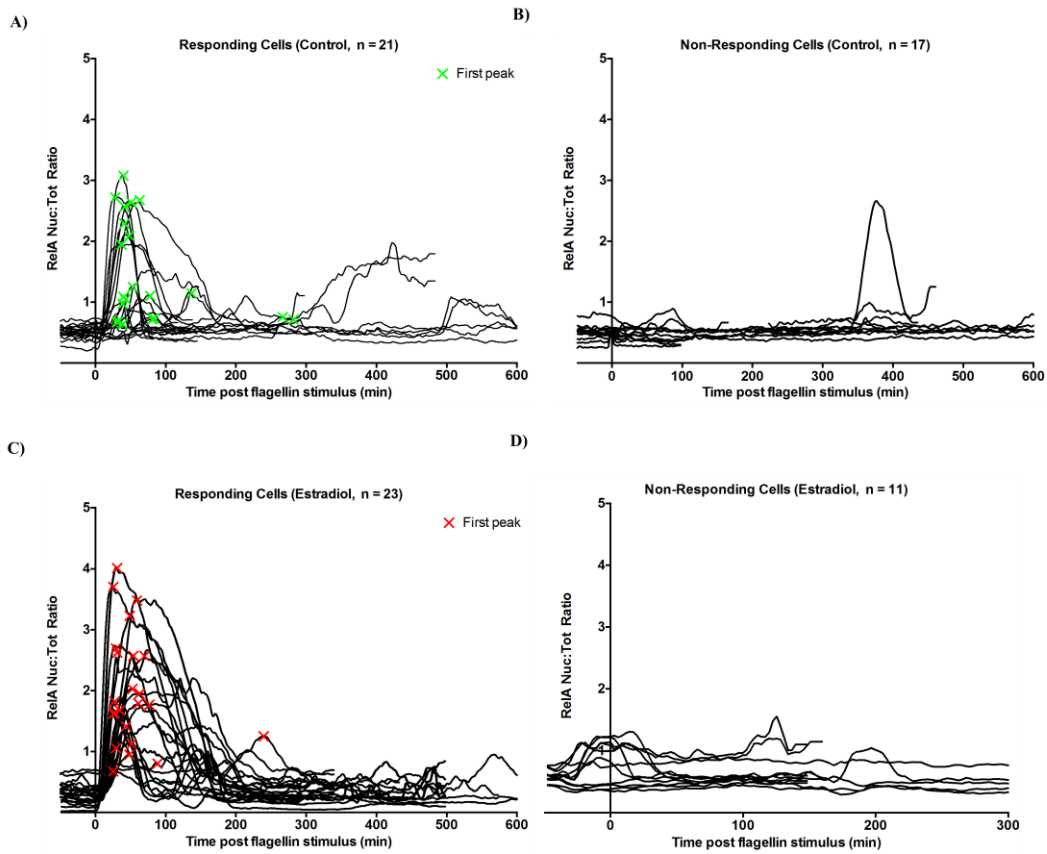

**Figure S3**

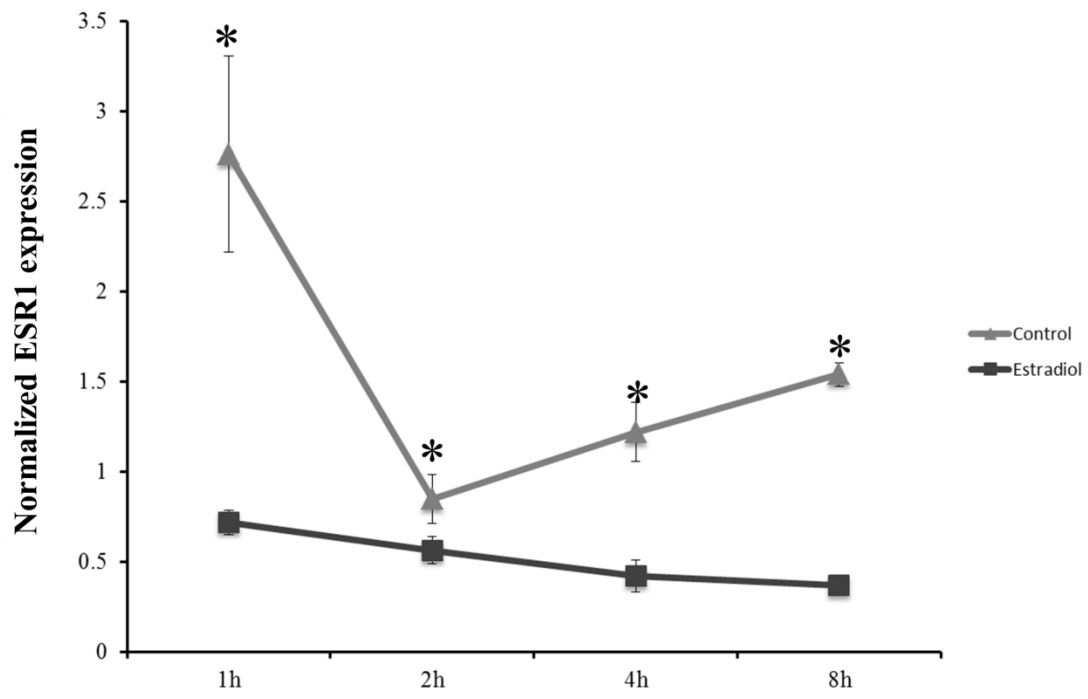

Figure S4

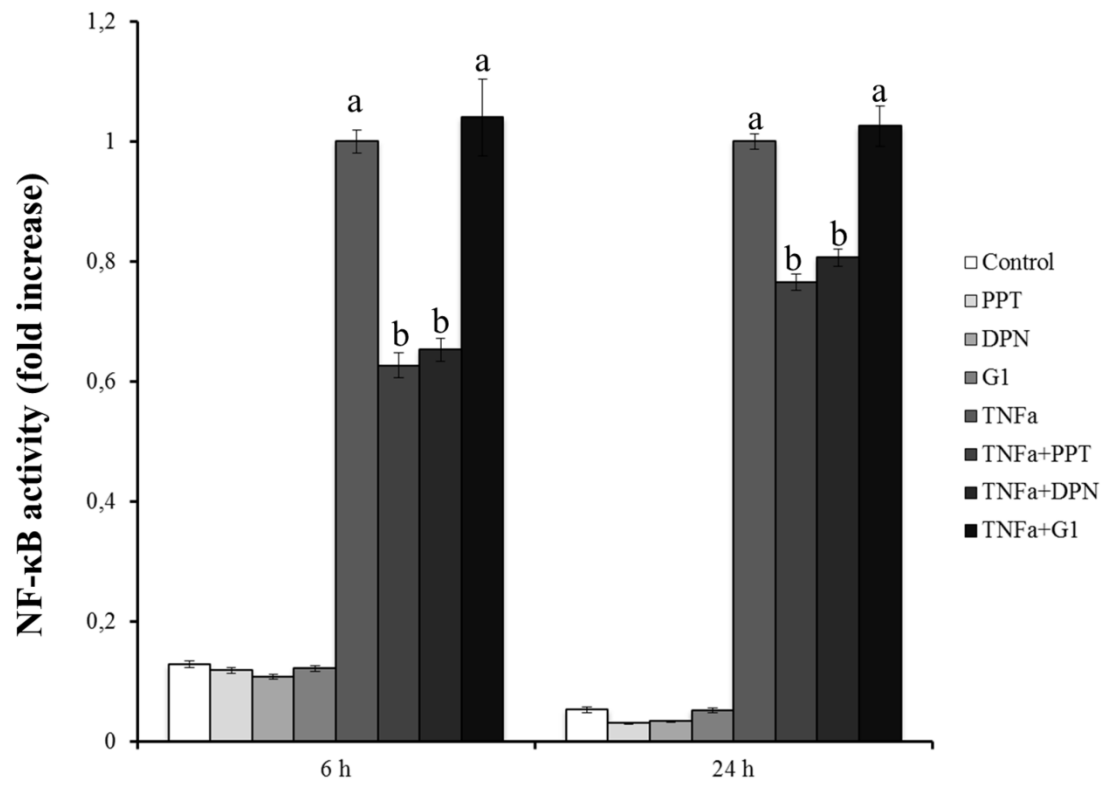

Supplement: srep40981-s1.pdf [file srep40981-s1.pdf]
